# Supplementary material for: Crystal structure and electronic properties of low-dimensional hexamethylenediaminium lead halide perovskites
Source: Royal Society of Chemistry journal article supplement (doi:10.1039/d3dt00438d), 2023-01-01
Supplement: d3dt00438d1.pdf [file d3dt00438d1.pdf]

## Crystal structure and electronic properties of low-dimensional hexamethylenediaminium lead halide perovskites

M.I. Balanov<sup>1</sup>, O.A. Brylev<sup>2</sup>, V.V. Korochencev<sup>1</sup>, R. Kevorkyants<sup>3</sup>, A.V. Emeline<sup>4</sup>, N.I. Selivanov<sup>4</sup>,  
Y.V. Chizhov<sup>4</sup>, A.V. Syuy<sup>5</sup>, D.S. Shtarev<sup>6\*</sup>

<sup>1</sup> *Institute of High Technologies and Advanced Materials of the Far Eastern Federal University, Vladivostok, Russky Island, Ajax, 10, 690022, Russia.*

<sup>2</sup> *Department of Materials Science, Moscow State University, 119991, Russia.*

<sup>3</sup> *Hong Kong Quantum AI Lab Ltd., HKSTP, Hong Kong, China.*

<sup>4</sup> *Laboratory "Photonics of Crystals", Saint-Petersburg State University, 198034, Russia.*

<sup>5</sup> *Center for Photonics and 2D Materials, Moscow Institute of Physics and Technology, Dolgoprudny, 141701 Russia.*

<sup>6</sup> *Shenzhen MSU-BIT University, Shenzhen, Ruyi Rd. 299, 518172, China.*

\* *Corresponding author's e-mail: shtarev@mail.ru; phone: +7 (924) 200-56-63*

### Supplementary materials

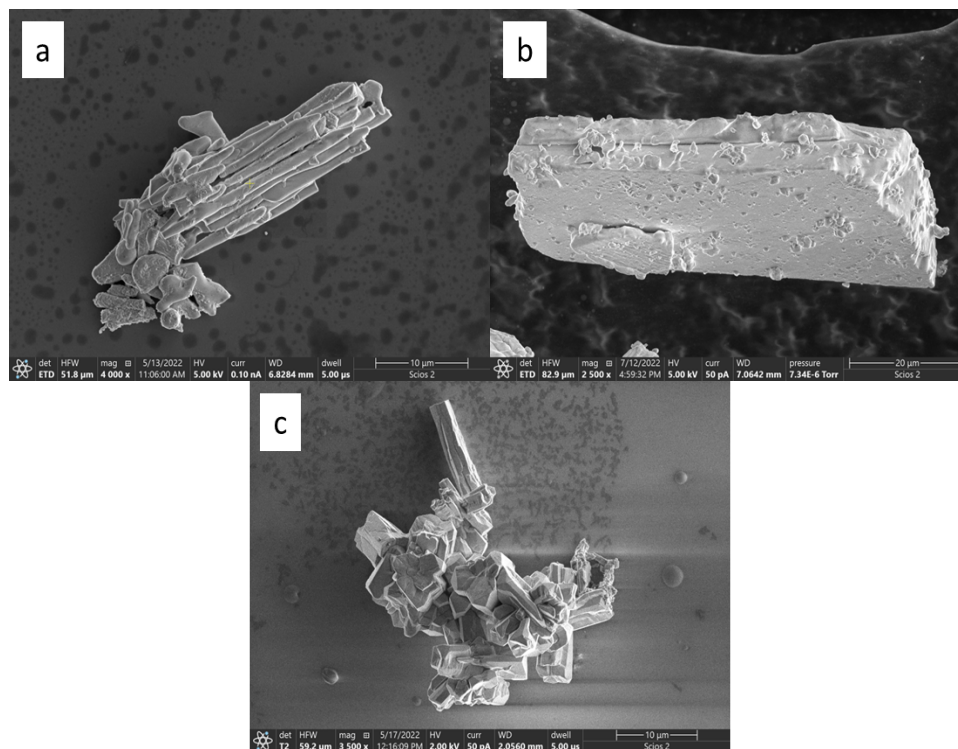

Figure S1 SEM images of typical microcrystals of HMDAPbX<sub>4</sub>: a) X=Cl; b) X=Br; c) X=I.

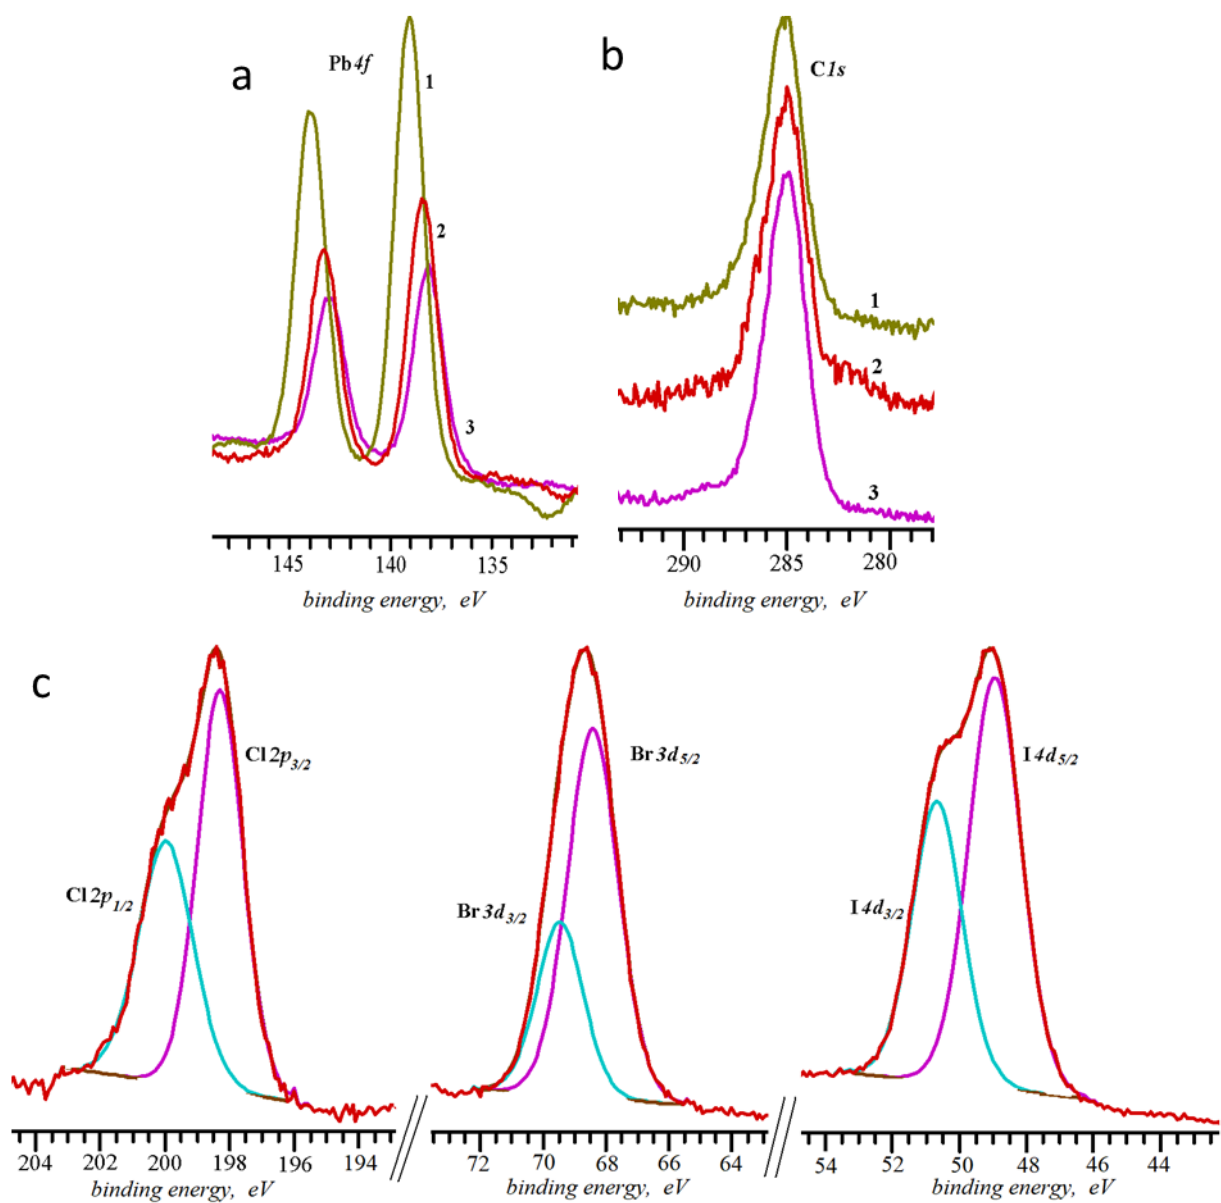

Figure S2 XPS spectra of HMDAPbX<sub>4</sub>, (X=Cl, Br, I) in the range of characteristic binding energies: a) Pb4f; b) C1s; c) halogens. 1, 2, and 3 correspond to Cl, Br, and I specie.

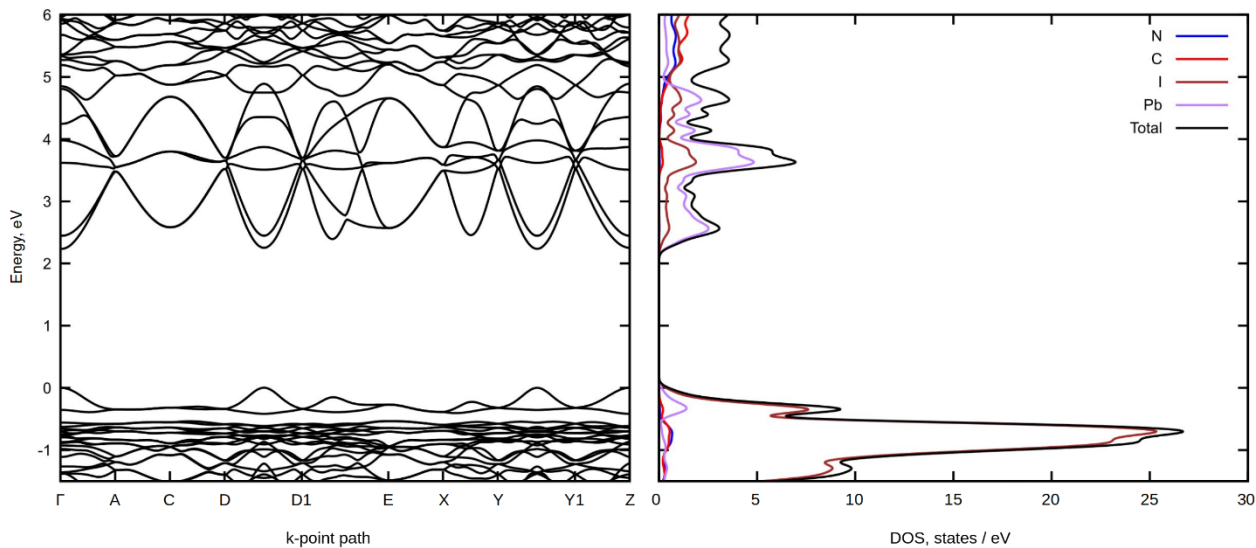

Figure S3 Electronic BS (left) and DOS (right) of HMDAPbI<sub>4</sub>.

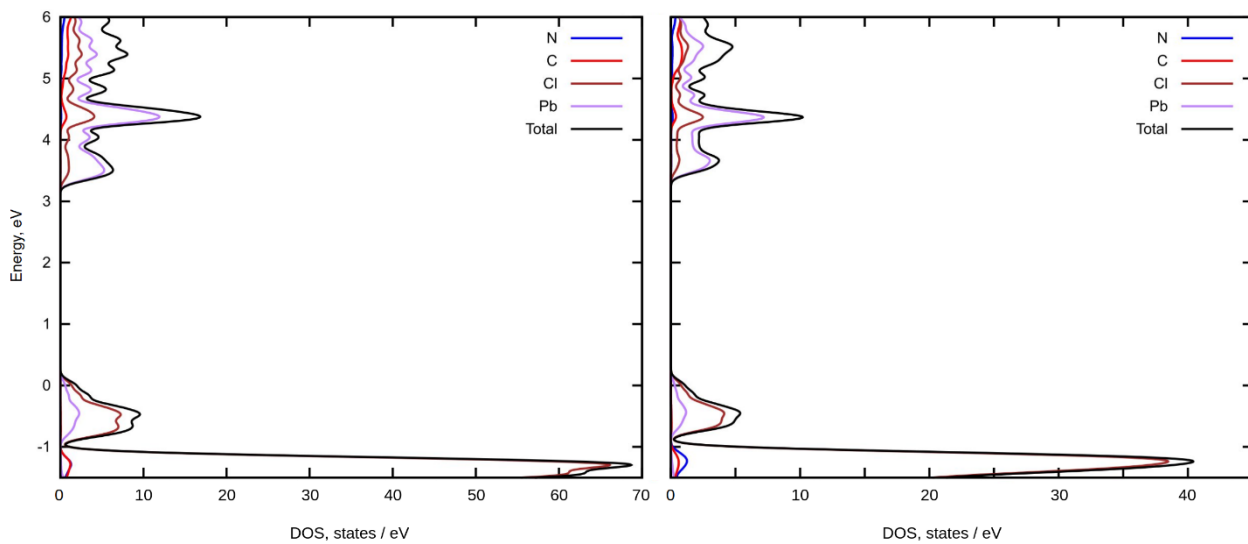

Figure S4 Electronic DOS of actual monocrystalline (left) and hypothetical (right) HMDAPbCl<sub>4</sub>.
